# Supplementary material
Source: Copernicus journal article supplement (doi:10.5194/essd-2026-303)

Peak\_SWE\_Value

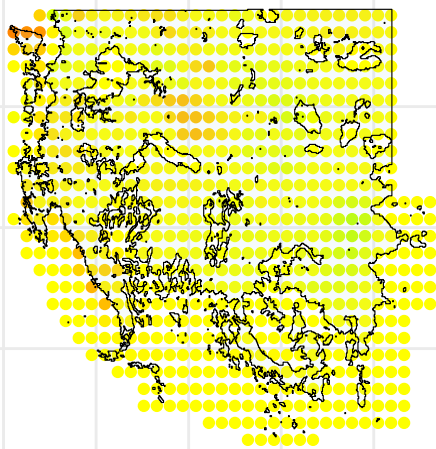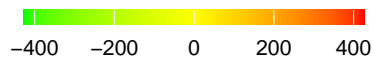

Mean\_Seasonal\_SWE

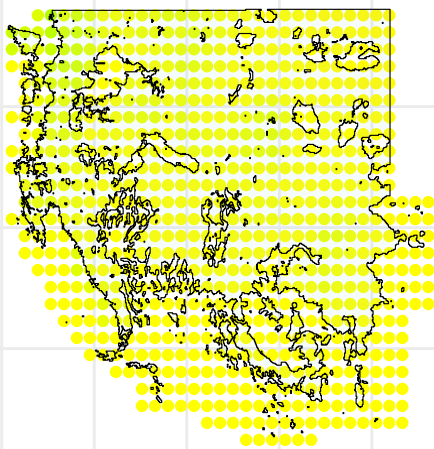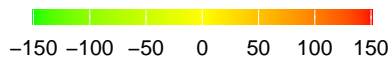

Snow\_Duration

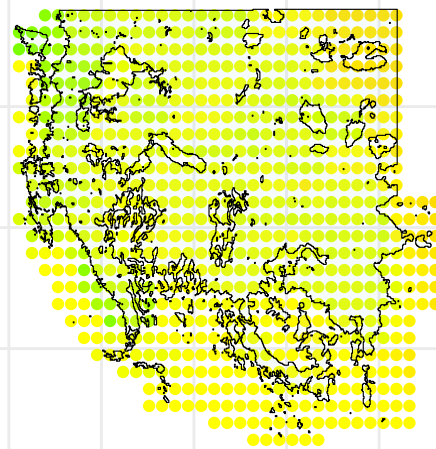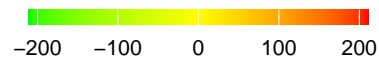

X.Snow\_Onset\_Day

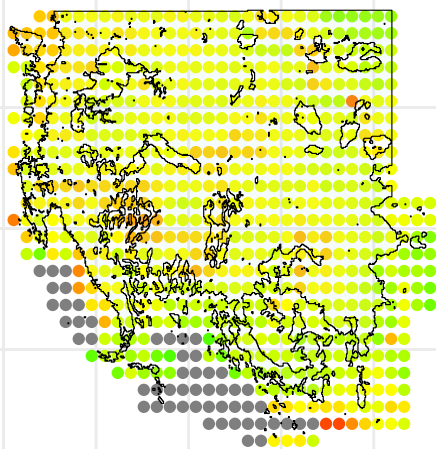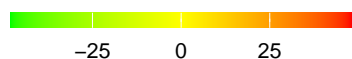

Peak\_SWE\_Timing

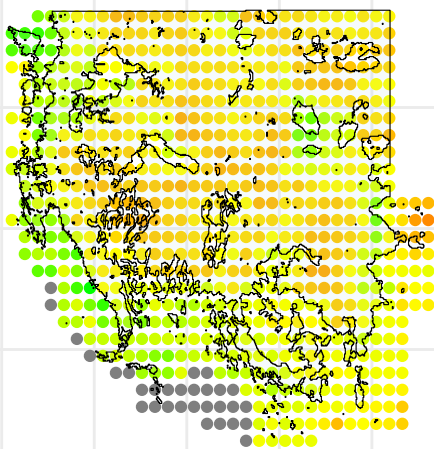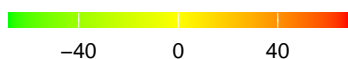

Melt\_Out\_Day

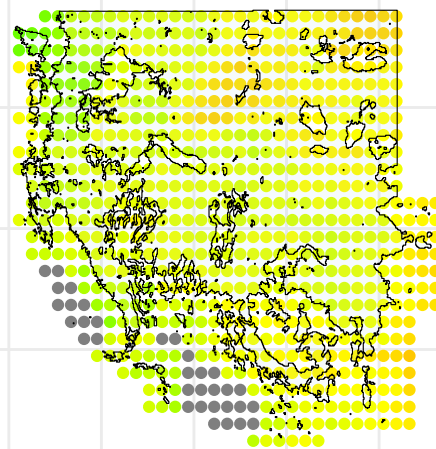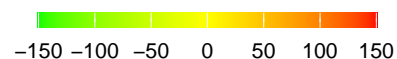

Snow\_Free\_Days

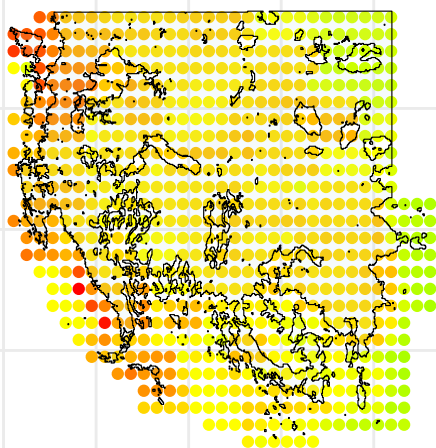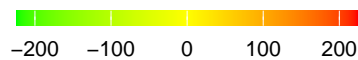

peak\_gcm\_slope

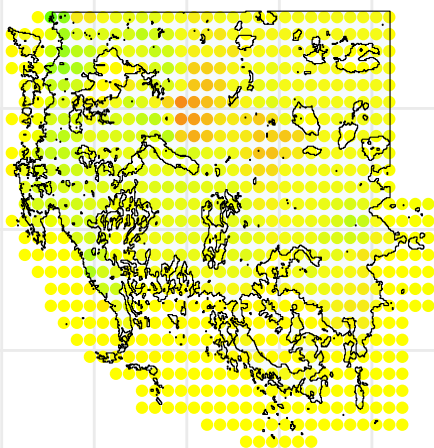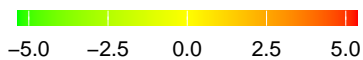

mean\_seasonal\_gcm\_slope

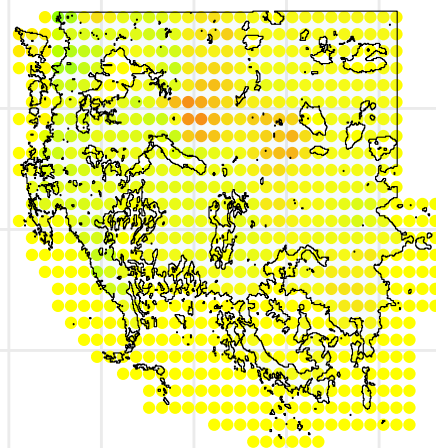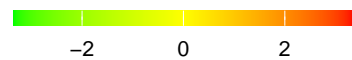

Supplement: Supplementary file 4 [file bias_corrected_EC-Earth3_1982_2014.pdf › supplement (1)/supplement/bias_corrected/bias_corrected_EC-Earth3_1982_2014.pdf]
