# Supplementary material
Source: Copernicus journal article supplement (doi:10.5194/essd-2026-303)
Supplement: Supplementary file 28 [file raw_gcm_UKESM1-0-LL_1982_2014.pdf › supplement (1)/supplement/raw_gcm/raw_gcm_UKESM1-0-LL_1982_2014.pdf]

Peak\_SWE\_Value

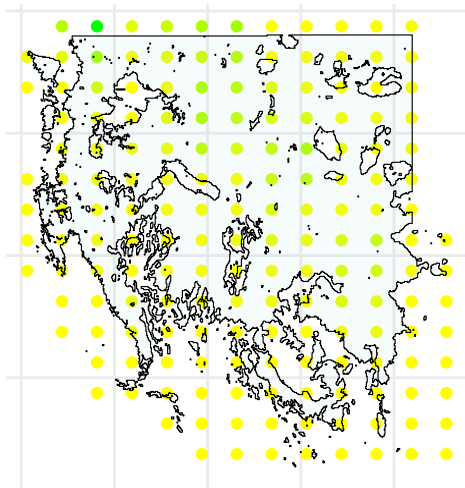

-400 0 400

Mean\_Seasonal\_SWE

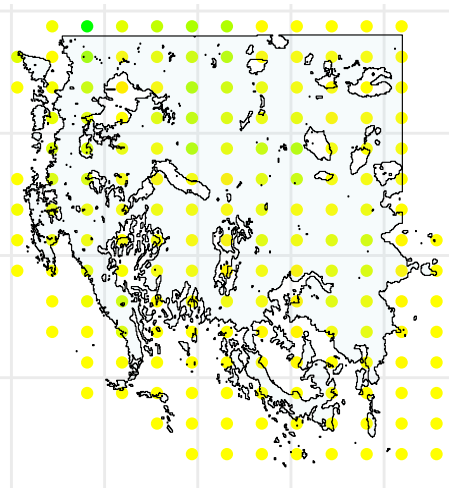

-200 0 200

Snow\_Duration

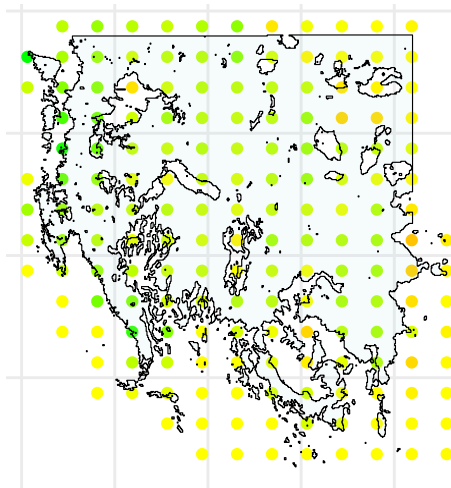

-200 -100 0 100 200

X.Snow\_Onset\_Day

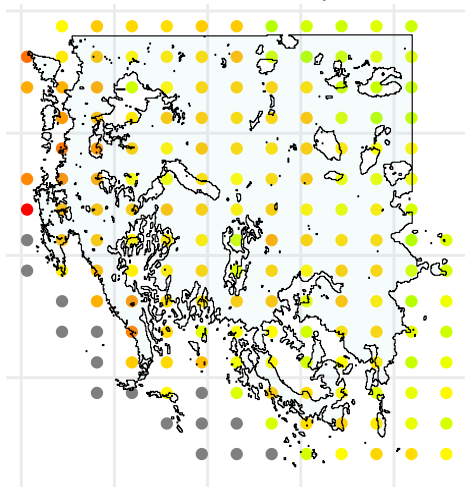

-60 -30 0 30 60

Peak\_SWE\_Timing

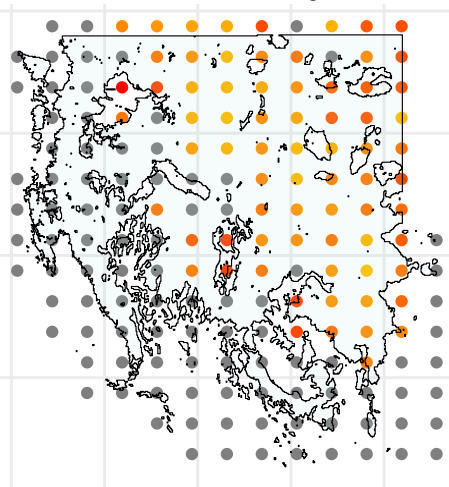

-100 -50 0 50 100

Melt\_Out\_Day

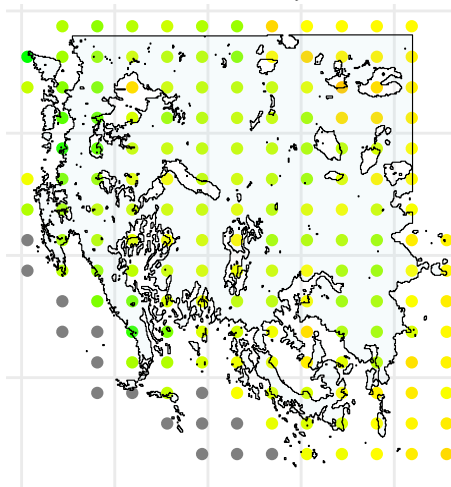

-100 -50 0 50 100

Snow\_Free\_Days

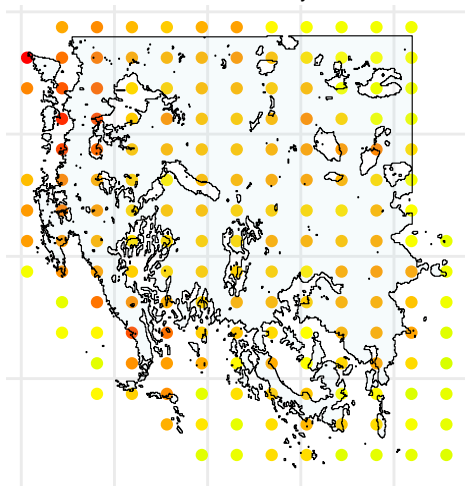

-200 -100 0 100 200

peak\_gcm\_slope

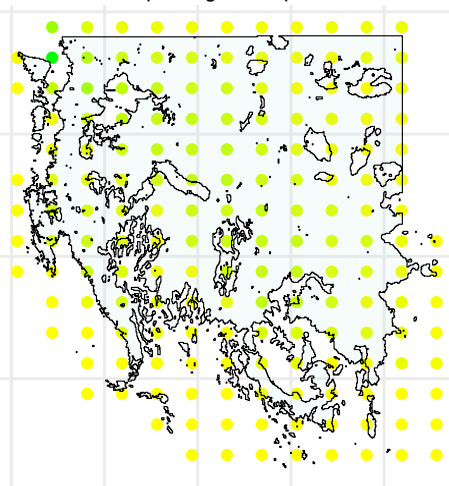

-5 0 5

mean\_seasonal\_gcm\_slope

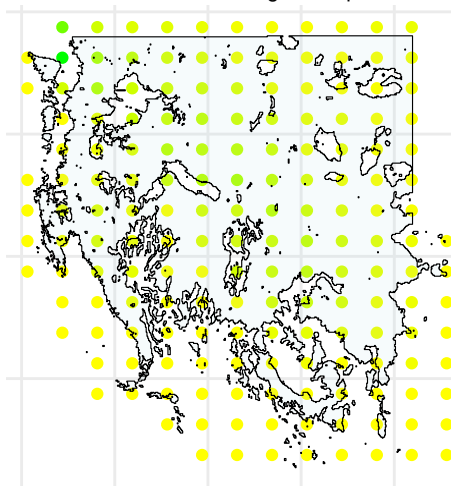

-2.5 0.0 2.5
